# Supplementary material
Source: PubMed Central journal article supplement (PMC5869841)
Supplement: JCM.01564-17_supp_data_source_323542_590518_1.pdf [file JCM.01564-17_supp_data_source_323542_590518_1.pdf]

**Supplementary table 1: EUCAST clinical susceptibility breakpoints and ECOFFs**

| Species                                             | EUCAST Clinical BPs (mg/L) |     |       |       |                    |       |       |     |       |       |     |     | EUCAST ECOFF (mg/L) |       |       |      |       |                   |
|-----------------------------------------------------|----------------------------|-----|-------|-------|--------------------|-------|-------|-----|-------|-------|-----|-----|---------------------|-------|-------|------|-------|-------------------|
|                                                     | AMB                        |     | MCF   |       | ANF                |       | FLZ   |     | VRZ   |       | ISA |     | AMB                 | MCF   | ANF   | FLZ  | VRZ   | ISA               |
|                                                     | S ≤                        | R > | S ≤   | R >   | S ≤                | R >   | S ≤   | R > | S ≤   | R >   | S ≤ | R > | WT ≤                | WT ≤  | WT ≤  | WT ≤ | WT ≤  | WT ≤              |
| <i>C. albicans</i> <sup>2</sup>                     | 1                          | 1   | 0.016 | 0.016 | 0.032              | 0.032 | 2     | 4   | 0.125 | 0.125 | ND  | ND  | 1                   | 0.016 | 0.032 | 1    | 0.125 | 0.03 <sup>1</sup> |
| <i>C. glabrata</i>                                  | 1                          | 1   | 0.032 | 0.032 | 0.064 <sup>3</sup> | 0.064 | 0.002 | 32  | IE    | IE    | ND  | ND  | 1                   | 0.032 | 0.064 | 32   | 1     | ND                |
| <i>C. krusei</i>                                    | 1                          | 1   | IE    | IE    | 0.064              | 0.064 | -     | -   | IE    | IE    | ND  | ND  | 1                   | 0.25  | 0.064 | 128  | 1     | ND                |
| <i>C. parapsilosis</i>                              | 1                          | 1   | 0.002 | 2     | 0.002              | 4     | 2     | 4   | 0.125 | 0.125 | ND  | ND  | 1                   | 2     | 4     | 2    | 0.125 | 0.03 <sup>1</sup> |
| <i>C. tropicalis</i>                                | 1                          | 1   | IE    | IE    | 0.064              | 0.064 | 2     | 4   | 0.125 | 0.125 | ND  | ND  | 1                   | 0.06  | 0.064 | 2    | 0.125 | 0.03 <sup>1</sup> |
| <i>Candida</i><br>non-species specific <sup>3</sup> | IE                         | IE  | IE    | IE    | IE                 | IE    | 2     | 4   | IE    | IE    | ND  | ND  | IE                  | IE    | IE    | IE   | IE    | ND                |

AMB: Amphotericin B; MCF: Micafungin; ANF: Anidulafungin; FLZ: Fluconazole; VRZ: Voriconazole; ISA: Isavuconazole. WT: Wild-type isolate

“-”: The species is considered a poor target for therapy with the drug and isolates reported as resistant irrespective of MIC values.

IE: There is insufficient evidence that the species is a good target for therapy with the drug. No susceptibility categorization is offered.

ND: No clinical breakpoints/ECOFFs are yet available for interpretation of drug susceptibility or wild-type

<sup>1</sup> No EUCAST ECOFFs have yet been made available. Proposed EUCAST ECOFFs used for *C. albicans*, *C. parapsilosis* and *C. tropicalis* (1).

<sup>2</sup> *C. dubliniensis* is considered to have similar breakpoints and wild-type distribution as *C. albicans*.

<sup>3</sup> For *C. kefyr* an anidulafungin EUCAST MIC of >0.64 mg/L was used as a marker of acquired resistance, based upon in house data showing 8/8 *C. kefyr* isolates (2004-11) all had an MIC of ≤ 0.03 mg/L.

## References

1. **Howard SJ, Lass-Flörl C, Cuenca-Estrella M, Gomez-Lopez A, Arendrup MC.** 2013. Determination of isavuconazole susceptibility of Aspergillus and Candida species by the EUCAST method. *Antimicrob Agents Chemother* **57**:5426–31.
