# Supplementary material
Source: PubMed Central journal article supplement (PMC5869841)
Supplement: JCM.01564-17_zjm999095827s2.pdf [file JCM.01564-17_zjm999095827s2.pdf]

**Supplementary table 2:** Characteristics of the departments of clinical microbiology and species distribution (no. (%)) of Danish fungal blood stream isolates 2012-2015.

|                                         | 1-RH   |      | 2-Cph City |      | 3-4-Cph County & Frederiksborg |      | 5-7- SW-Sealand |      | 8-Funen    |      | 9-S-Jutland |      | 10-Esbjerg |      | 11-Vejle   |      | 12-13-Herning/Viborg |      | 14-N-Jutland        |      | 15-Aarhus  |      | In total   |      |
|-----------------------------------------|--------|------|------------|------|--------------------------------|------|-----------------|------|------------|------|-------------|------|------------|------|------------|------|----------------------|------|---------------------|------|------------|------|------------|------|
| Department characteristics <sup>a</sup> | U      |      | U/D        |      | U/D                            |      | U/D             |      | U/D        |      | D           |      | D          |      | D          |      | D                    |      | U/D                 |      | U/D        |      | U/D        |      |
| BC system                               | BACTEC |      | BacT/ALERT |      | BacT/ALERT and BACTEC          |      | BacT/ALERT      |      | BacT/ALERT |      | BacT/ALERT  |      | BacT/ALERT |      | BacT/ALERT |      | BacT/ALERT           |      | BacT/ALERT → BACTEC |      | BacT/ALERT |      | BacT/ALERT |      |
| Episode rates /100,000 inhab.           | NA     |      | 5.5        |      | 6.7                            |      | 7.1             |      | 13.1       |      | 3.1         |      | 7.8        |      | 5.8        |      | 6.3                  |      | 6.5                 |      | 9.3        |      | 8.4        |      |
| /1000 discharges                        | 0.7    |      | 0.3        |      | 0.2                            |      | 0.3             |      | 0.6        |      | 0.2         |      | 0.5        |      | 0.3        |      | 0.3                  |      | 0.3                 |      | 0.4        |      | 0.3        |      |
| /10,000 bed days                        | 1.8    |      | 1.1        |      | 0.8                            |      | 0.9             |      | 1.6        |      | 0.6         |      | 1.5        |      | 0.8        |      | 1.0                  |      | 0.8                 |      | 1.3        |      | 1.1        |      |
| <b>Species distribution (no (%))</b>    |        |      |            |      |                                |      |                 |      |            |      |             |      |            |      |            |      |                      |      |                     |      |            |      |            |      |
| <i>C. albicans</i>                      | 111    | 41%  | 95         | 41%  | 110                            | 51%  | 106             | 44%  | 115        | 50%  | 14          | 47%  | 46         | 58%  | 35         | 52%  | 58                   | 44%  | 72                  | 47%  | 166        | 57%  | 928        | 48%  |
| <i>C. dubliniensis</i>                  | 8      | 3%   | 8          | 3%   | 8                              | 4%   | 7               | 3%   | 12         | 5%   | 2           | 7%   | 1          | 1%   | 1          | 1%   | 7                    | 5%   | 6                   | 4%   | 11         | 4%   | 71         | 4%   |
| <i>C. glabrata</i>                      | 73     | 27%  | 87         | 38%  | 59                             | 28%  | 92              | 38%  | 71         | 31%  | 12          | 40%  | 27         | 34%  | 22         | 33%  | 45                   | 34%  | 51                  | 33%  | 78         | 27%  | 617        | 32%  |
| <i>C. krusei</i>                        | 17     | 6%   | 9          | 4%   | 9                              | 4%   | 14              | 6%   | 8          | 3%   | 0           | 0%   | 1          | 1%   | 1          | 1%   | 4                    | 3%   | 3                   | 2%   | 9          | 3%   | 75         | 4%   |
| <i>C. parapsilosis</i>                  | 21     | 8%   | 5          | 2%   | 8                              | 4%   | 5               | 2%   | 5          | 2%   | 0           | 0%   | 1          | 1%   | 3          | 4%   | 5                    | 4%   | 5                   | 3%   | 6          | 2%   | 64         | 3%   |
| <i>C. tropicalis</i>                    | 13     | 5%   | 15         | 7%   | 11                             | 5%   | 9               | 4%   | 10         | 4%   | 1           | 3%   | 1          | 1%   | 3          | 4%   | 6                    | 5%   | 5                   | 3%   | 9          | 3%   | 83         | 4%   |
| <i>Candida</i> spp. <sup>b</sup>        | 18     | 7%   | 8          | 3%   | 5                              | 2%   | 8               | 3%   | 6          | 3%   | 1           | 3%   | 1          | 1%   | 1          | 1%   | 5                    | 4%   | 8                   | 5%   | 8          | 3%   | 69         | 4%   |
| Other fungi <sup>c</sup>                | 9      | 3%   | 3          | 1%   | 4                              | 2%   | 1               | 0%   | 3          | 1%   | 0           | 0%   | 2          | 3%   | 1          | 1%   | 2                    | 2%   | 4                   | 3%   | 3          | 1%   | 32         | 2%   |
| <b>In total</b>                         | 270    | 100% | 230        | 100% | 214                            | 100% | 242             | 100% | 230        | 100% | 30          | 100% | 80         | 100% | 67         | 100% | 132                  | 100% | 154                 | 100% | 290        | 100% | 1939       | 100% |

BC system: Blood culture system. Center 3-4 has two separate blood culture systems on different hospitals while Center 14 changed blood culture system in 2015.

<sup>a</sup>) Characteristics of the hospitals served by the department: U: University hospital; D: District hospital(s).

<sup>b</sup>) *Candida* sp. includes: *C. lusitanae* (19), *C. kefyr* (13), *C. fermentati* (8), *C. pelliculosa* (6), *C. guilliermondii* (5), *C. inconspicua* (4), *C. orthopsilosis* (3); *C. magnoliae* and *C. nivariensis* (2 each); *C. fabianii*, *C. metapsilosis*, *C. norvegiensis*, *C. palmeoleophila* and *C. utilis* (1 each) and finally two *Candida* isolates not referred for species identification.

<sup>c</sup>) Other fungi includes: *S. cerevisiae* (11), *Fusarium dimerum* and *Cryptococcus neoformans* (4 each), *Fusarium solani* (3), *Fusarium oxysporum*, *Rhodotorula mucilaginosa* and *Saprochaeta clavata* (2 each); *A. fumigatus*, *Penicillium marneffeii*, *Trichosporon asahii* and *Williopsis saturnus* (1 each).
