# Supplementary material
Source: PubMed Central journal article supplement (PMC5869841)
Supplement: JCM.01564-17_zjm999095827s3.pdf [file JCM.01564-17_zjm999095827s3.pdf]

**Supplementary table 3:** Age and gender specific species distribution of Danish fungal blood stream isolates 2012-2015.

|                               | <1   |      | 1-9  |      | 10-19 |      | 20-29 |      | 30-39 |      | 40-49 |      | 50-59 |      | 60-69 |      | 70-79 |      | 80-89 |      | 90-99 |      | Total |      |
|-------------------------------|------|------|------|------|-------|------|-------|------|-------|------|-------|------|-------|------|-------|------|-------|------|-------|------|-------|------|-------|------|
|                               | F    | M    | F    | M    | F     | M    | F     | M    | F     | M    | F     | M    | F     | M    | F     | M    | F     | M    | F     | M    | F     | M    | F     | M    |
| <b><i>C. albicans</i></b>     | 11   | 8    | 8    | 9    | 2     | 1    | 7     | 10   | 7     | 7    | 27    | 35   | 55    | 67   | 99    | 143  | 85    | 180  | 55    | 95   | 4     | 13   | 360   | 568  |
| <b>(no., %)</b>               | 91.7 | 80.0 | 57.1 | 64.3 | 20.0  | 14.3 | 35.0  | 55.6 | 29.2  | 25.0 | 48.2  | 41.7 | 51.9  | 47.5 | 49.0  | 49.0 | 41.1  | 52.5 | 45.1  | 49.2 | 30.8  | 56.5 | 45.8  | 49.3 |
| <b><i>C. dubliniensis</i></b> | -    | -    | -    | -    | 1     | -    | 5     | 1    | 4     | 2    | 2     | 7    | 3     | 4    | 10    | 11   | 5     | 8    | 4     | 4    | -     | -    | 34    | 37   |
| <b>(no.,%)</b>                | 0.0  | 0.0  | 0.0  | 0.0  | 10.0  | 0.0  | 25.0  | 5.6  | 16.7  | 7.1  | 3.6   | 8.3  | 2.8   | 2.8  | 5.0   | 3.8  | 2.4   | 2.3  | 3.3   | 2.1  | 0.0   | 0.0  | 4.3   | 3.2  |
| <b><i>C. glabrata</i></b>     | -    | 1    | 2    | 2    | 2     | 1    | 6     | 3    | 7     | 10   | 15    | 19   | 34    | 40   | 61    | 83   | 72    | 111  | 59    | 71   | 9     | 9    | 267   | 350  |
| <b>(no., %)</b>               | 0.0  | 10.0 | 14.3 | 14.3 | 20.0  | 14.3 | 30.0  | 16.7 | 29.2  | 35.7 | 26.8  | 22.6 | 32.1  | 28.4 | 30.2  | 28.4 | 34.8  | 32.4 | 48.4  | 36.8 | 69.2  | 39.1 | 34.0  | 30.4 |
| <b><i>C. krusei</i></b>       | -    | -    | -    | 1    | -     | -    | 1     | -    | -     | 1    | 3     | 7    | 4     | 4    | 9     | 14   | 13    | 11   | 1     | 6    | -     | -    | 31    | 44   |
| <b>(no., %)</b>               | 0.0  | 0.0  | 0.0  | 7.1  | 0.0   | 0.0  | 5.0   | 0.0  | 0.0   | 3.6  | 5.4   | 8.3  | 3.8   | 2.8  | 4.5   | 4.8  | 6.3   | 3.2  | 0.8   | 3.1  | 0.0   | 0.0  | 3.9   | 3.8  |
| <b><i>C. parapsilosis</i></b> | -    | 1    | 1    | 1    | 1     | 3    | -     | -    | 2     | -    | 1     | 3    | 3     | 7    | 10    | 14   | 9     | 4    | -     | 4    | -     | -    | 27    | 37   |
| <b>(no., %)</b>               | 0.0  | 10.0 | 7.1  | 7.1  | 10.0  | 42.9 | 0.0   | 0.0  | 8.3   | 0.0  | 1.8   | 3.6  | 2.8   | 5.0  | 5.0   | 4.8  | 4.3   | 1.2  | 0.0   | 2.1  | 0.0   | 0.0  | 3.4   | 3.2  |
| <b><i>C. tropicalis</i></b>   | 1    | -    | -    | -    | -     | -    | -     | -    | 4     | 4    | 4     | 8    | 5     | 8    | 6     | 10   | 12    | 14   | 1     | 6    | -     | -    | 33    | 50   |
| <b>(no., %)</b>               | 8.3  | 0.0  | 0.0  | 0.0  | 0.0   | 0.0  | 0.0   | 0.0  | 16.7  | 14.3 | 7.1   | 9.5  | 4.7   | 5.7  | 3.0   | 3.4  | 5.8   | 4.1  | 0.8   | 3.1  | 0.0   | 0.0  | 4.2   | 4.3  |
| <b><i>Candida sp.</i></b>     | -    | -    | 2    | 1    | 3     | 1    | -     | 3    | -     | 4    | 1     | 2    | 2     | 6    | 6     | 13   | 9     | 9    | 1     | 5    | -     | 1    | 24    | 45   |
| <b>(no., %)</b>               | 0.0  | 0.0  | 14.3 | 7.1  | 30.0  | 14.3 | 0.0   | 16.7 | 0.0   | 14.3 | 1.8   | 2.4  | 1.9   | 4.3  | 3.0   | 4.5  | 4.3   | 2.6  | 0.8   | 2.6  | 0.0   | 4.3  | 3.1   | 3.9  |
| <b>Other fungi</b>            | -    | -    | 1    | -    | 1     | 1    | 1     | 1    | -     | -    | 3     | 3    | -     | 5    | 1     | 4    | 2     | 6    | 1     | 2    | -     | -    | 10    | 22   |
| <b>(no., %)</b>               | 0.0  | 0.0  | 7.1  | 0.0  | 10.0  | 14.3 | 5.0   | 5.6  | 0.0   | 0.0  | 5.4   | 3.6  | 0.0   | 3.5  | 0.5   | 1.4  | 1.0   | 1.7  | 0.8   | 1.0  | 0.0   | 0.0  | 1.3   | 1.9  |
| <b>In total (no.)</b>         | 12   | 10   | 14   | 14   | 10    | 7    | 20    | 18   | 24    | 28   | 56    | 84   | 106   | 141  | 202   | 292  | 207   | 343  | 122   | 193  | 13    | 23   | 786   | 1153 |
