# Supplementary material
Source: PubMed Central journal article supplement (PMC5869841)
Supplement: JCM.01564-17_zjm999095827s4.pdf [file JCM.01564-17_zjm999095827s4.pdf]

## Supplementary data 4.

### Less common species

The susceptibility pattern for the other fungi was more diverse (Table 4). Resistance to amphotericin B (MIC 2- >32 mg/L) was found for 6/8 *Fusarium* isolates. High level echinocandin resistance (MICs >1 mg/L) was demonstrated for all isolates except *S. cerevisiae* (anidulafungin: 0.06-0.25 mg/L and micafungin 0.125-0.25 mg/L) and *W. saturnus* (both echinocandins: 0.06 mg/L) and for which the MIC distributions thus saddled the *Candida* echinocandin susceptibility breakpoints. Finally, all isolates were highly resistant to fluconazole (MICs  $\geq$  16 mg/L) except 4/4 *C. neoformans* and 7/10 *S. cerevisiae* (fluconazole MICs of 4-8 mg/L for all 10). The activity of voriconazole and isavuconazole was broader with MICs for both compounds in the 0.06-0.5 mg/L range except for *Fusarium* (voriconazole:  $\geq$ 2 mg/L and isavuconazole:  $\geq$ 4 mg/L), *A. fumigatus* (voriconazole: 0.5 and isavuconazole: 1 mg/L), *Saprochaeta* (voriconazole: 0.25 and 1 mg/L and isavuconazole:1-2 mg/L) and *Rhodotorula* (voriconazole:  $\geq$ 4 mg/L and isavuconazole 0.5-1 mg/L), respectively.
