# Supplementary material
Source: PubMed Central journal article supplement (PMC5869841)
Supplement: JCM.01564-17_zjm999095827s5.pdf [file JCM.01564-17_zjm999095827s5.pdf]

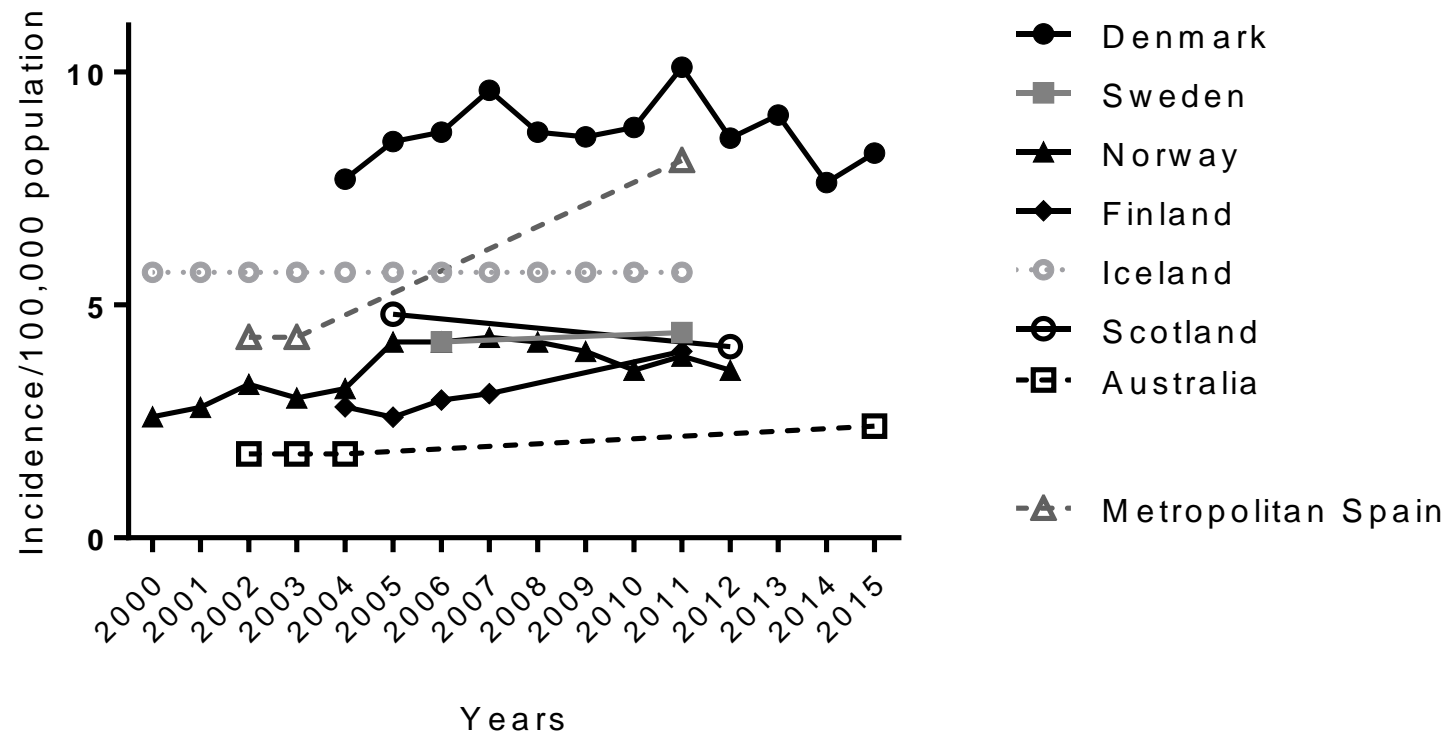

**Supplementary figure 1:** Annual incidence rates per 100,000 population from national fungaemia surveys and metropolitan Spain 2000-2015.

Horizontal lines represent incidence data that are averages over several years. When a observation period straddled two calendar years, the incidence was plotted for the year with the most months.
